# Supplementary material for: WHIRL Study: Workplace Health Interprofessional Learning in the Construction Industry
Source: Preprints.org preprint supplement (doi:10.20944/preprints202008.0450.v1), 2020-08-20
Supplement: Supplementary file 2 [file Supplementary File 2. Inventory of Reflective Vignette – Interprofessional TERPROFESSIONAL LEARNING.docx]

| | **IRV-IPL** | | --- | |  | | **BEFORE the Test@Work health checks I was able to:** | | | | | | **AFTER the Test@Work health checks I was able to:** | | | | | | **If I did health checks in the future I would be able to:** | | | | | |
| --- | --- | --- | --- | --- | --- | --- | --- | --- | --- | --- | --- | --- | --- | --- | --- | --- | --- | --- | --- | --- |
| | ***Collaboration: purposeful working relationships*** | | --- | | ***1*** | ***2*** | ***3*** | ***4*** | ***5*** | ***6*** | ***1*** | ***2*** | ***3*** | ***4*** | ***5*** | ***6*** | ***1*** | ***2*** | ***3*** | ***4*** | ***5*** | ***6*** |
| | Work well with the team members | | --- | |  |  |  |  |  |  |  |  |  |  |  |  |  |  |  |  |  |  |
| | Seek other members to accomplish the work | | --- | |  |  |  |  |  |  |  |  |  |  |  |  |  |  |  |  |  |  |
| | Include other team members in making plans/decisions | | --- | |  |  |  |  |  |  |  |  |  |  |  |  |  |  |  |  |  |  |
| | Use a team approach to achieve the goals/outcomes | | --- | |  |  |  |  |  |  |  |  |  |  |  |  |  |  |  |  |  |  |
| | Explain the roles/tasks of each team member | | --- | |  |  |  |  |  |  |  |  |  |  |  |  |  |  |  |  |  |  |
| | ***Coordination: faithful mutual performances*** | | --- | | ***1*** | ***2*** | ***3*** | ***4*** | ***5*** | ***6*** | ***1*** | ***2*** | ***3*** | ***4*** | ***5*** | ***6*** | ***1*** | ***2*** | ***3*** | ***4*** | ***5*** | ***6*** |
| | Negotiate tasks/responsibilities with other team members | | --- | |  |  |  |  |  |  |  |  |  |  |  |  |  |  |  |  |  |  |
| | Inform others for any changes | | --- | |  |  |  |  |  |  |  |  |  |  |  |  |  |  |  |  |  |  |
| | Work well with team members doing other tasks | | --- | |  |  |  |  |  |  |  |  |  |  |  |  |  |  |  |  |  |  |
| | Discuss your plans/actions with other team members | | --- | |  |  |  |  |  |  |  |  |  |  |  |  |  |  |  |  |  |  |
| | Know the work/responsibility of other team members | | --- | |  |  |  |  |  |  |  |  |  |  |  |  |  |  |  |  |  |  |
| | ***Cooperation: helpful personal interactions*** | | --- | | ***1*** | ***2*** | ***3*** | ***4*** | ***5*** | ***6*** | ***1*** | ***2*** | ***3*** | ***4*** | ***5*** | ***6*** | ***1*** | ***2*** | ***3*** | ***4*** | ***5*** | ***6*** |
| | Share my inputs/abilities with other team members | | --- | |  |  |  |  |  |  |  |  |  |  |  |  |  |  |  |  |  |  |
| | Be responsible with my contributions to the team | | --- | |  |  |  |  |  |  |  |  |  |  |  |  |  |  |  |  |  |  |
| | Show my support/concern for other team members | | --- | |  |  |  |  |  |  |  |  |  |  |  |  |  |  |  |  |  |  |
| | Offer useful information to other participants | | --- | |  |  |  |  |  |  |  |  |  |  |  |  |  |  |  |  |  |  |
| | Help other team members when necessary | | --- | |  |  |  |  |  |  |  |  |  |  |  |  |  |  |  |  |  |  |
| | ***Communication: respectful social interactions*** | | --- | | ***1*** | ***2*** | ***3*** | ***4*** | ***5*** | ***6*** | ***1*** | ***2*** | ***3*** | ***4*** | ***5*** | ***6*** | ***1*** | ***2*** | ***3*** | ***4*** | ***5*** | ***6*** |
| | Listen actively to other team members | | --- | |  |  |  |  |  |  |  |  |  |  |  |  |  |  |  |  |  |  |
| | Express my concerns in a professional manner | | --- | |  |  |  |  |  |  |  |  |  |  |  |  |  |  |  |  |  |  |
| | Encourage others to ask useful questions politely | | --- | |  |  |  |  |  |  |  |  |  |  |  |  |  |  |  |  |  |  |
| | Share my thoughts in a clear effective manner | | --- | |  |  |  |  |  |  |  |  |  |  |  |  |  |  |  |  |  |  |
| | Manage conflict in a courteous manner | | --- | |  |  |  |  |  |  |  |  |  |  |  |  |  |  |  |  |  |  |
| | ***Commendation: thoughtful professional appreciations*** | | --- | | ***1*** | ***2*** | ***3*** | ***4*** | ***5*** | ***6*** | ***1*** | ***2*** | ***3*** | ***4*** | ***5*** | ***6*** | ***1*** | ***2*** | ***3*** | ***4*** | ***5*** | ***6*** |
| | Give constructive feedbacks to other team members | | --- | |  |  |  |  |  |  |  |  |  |  |  |  |  |  |  |  |  |  |
| | Show trust in other team members while learning/working | | --- | |  |  |  |  |  |  |  |  |  |  |  |  |  |  |  |  |  |  |
| | Recognize the performance of other participants | | --- | |  |  |  |  |  |  |  |  |  |  |  |  |  |  |  |  |  |  |
| | Appreciate the contributions of other team members | | --- | |  |  |  |  |  |  |  |  |  |  |  |  |  |  |  |  |  |  |
| | Consider the inputs/ideas of other participants | | --- | |  |  |  |  |  |  |  |  |  |  |  |  |  |  |  |  |  |  |
